# Supplementary material for: Novel Organic Mineral Complex Prevents High-Fat Diet-Induced Changes in the Gut and Liver of Male Sprague-Dawley Rats
Source: J Nutr Metab. 2020 Dec 17;2020:8846401. doi: 10.1155/2020/8846401 (PMC7768589; doi:10.1155/2020/8846401)
Supplement: Supplementary Materials — Supplemental Table 1: statistical analyses of week 0 average percent relative abundance of microbiota in fecal samples collected from animals in each group. Supplemental Table 2: statistical analyses of week 10 average percent relative abundance of microbiota in fecal samples collected from animals in each group. [file 8846401.f1.zip]

Archive with 2 entries (2 files):
- 8846401.f1/Crawford et al., Supplemental Table 1.docx
- 8846401.f1/Crawford et al., Supplemental Table 2.docx
